# Supplementary material for: Reactivity of the zwitterionic ligand EtNHC(S)Ph2PNPPh2C(S)NEt towards [Ru3(CO)12]. Sulfur transfer and ligand fragmentation leading to the methideylamide [-N(Et)-CH(R)-] μ3-bridging moiety
Source: Royal Society of Chemistry journal article supplement (doi:10.1039/b812050a), 2008-11-12
Supplement: b812050a.pdf [file b812050a.pdf]

**Supporting Information for**

**Reactivity of the Zwitterionic Ligand EtNHC(S)Ph<sub>2</sub>P=NPh<sub>2</sub>C(S)NEt  
towards Ru<sub>3</sub>(CO)<sub>12</sub>. Ligand Fragmentation Leading to the  
Methideylamide [-N(Et)-CH-] μ<sub>3</sub>-Bridging Moiety.**

Massimiliano Delferro, Roberto Pattacini, Daniele Cauzzi,\* Claudia Graiff,  
Mattia Terenghi, Giovanni Predieri and Antonio Tiripicchio

Dipartimento di Chimica Generale ed Inorganica, Chimica Analitica, Chimica Fisica, Università di Parma,  
Viale G.P. Usberti 17/A, 43100, Parma, Italy.

E-mail: [cauzzi@unipr.it](mailto:cauzzi@unipr.it)

The masses observed for cluster **6** and the intensity ratio of the different isotope peaks are in excellent agreement with the calculated pattern for the expected protonated molecule  $\{\text{Ru}_3(\text{CO})_7(\mu_3\text{-S})[(\mu_2\text{-N}:\eta\text{-C}:\kappa\text{-P})\text{Ph}_2\text{PN}=\text{PPh}_2\text{CHNEt}](\text{H})\}^+$  ( $[\text{M}+\text{H}]^+-\text{CO}$ ). Furthermore, other signals were present at  $m/z = 1041, 1025, 1003, 947, 919$  and  $891$  Da attributed respectively to  $[\text{M}+\text{K}]^+, [\text{M}+\text{Na}]^+, [\text{M}+\text{H}]^+, ([\text{M}+\text{H}]^+-2\text{CO}), ([\text{M}+\text{H}]^+-3\text{CO}), ([\text{M}+\text{H}]^+-4\text{CO})$  (Figure S1).

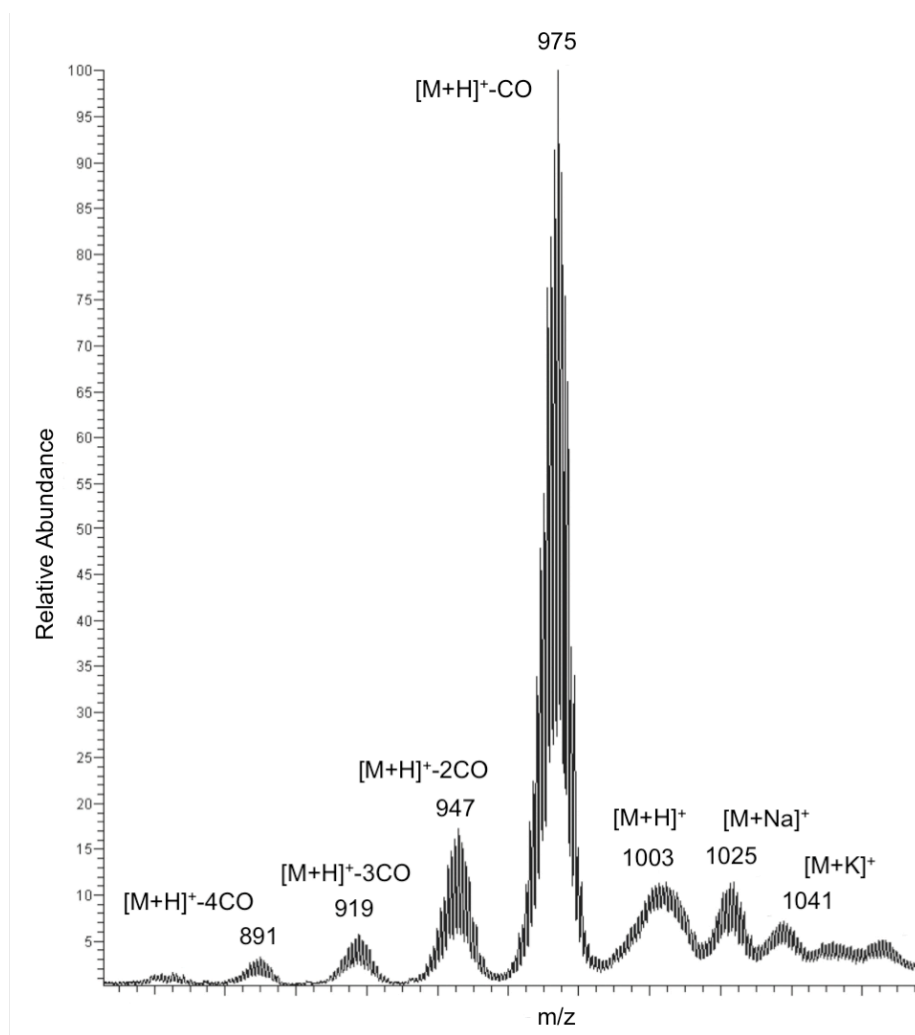

**Figure S1** Positive ion ESI-MS of cluster **6** in  $\text{CH}_3\text{OH}$ .

These mass-to-charge ratios were interpreted as spectral fragments derived from the cluster in the LIT experiment, due to the desolvation temperature ( $250^\circ\text{C}$ ) and intrinsic instability of the CO molecule as ligand in gas phase. For refined tandem mass spectrum structural characterization, the gaseous  $\{\text{Ru}_3(\text{CO})_8(\mu_3\text{-S})[(\mu_2\text{-N}:\eta\text{-C}:\kappa\text{-P})\text{Ph}_2\text{PN}=\text{PPh}_2\text{CHNEt}](\text{H})\}^+$  ( $[\text{M}+\text{H}]^+$ ) protonated cluster centered at  $m/z = 1003$  Da was mass-selected for collision-induced dissociation (CID). The product ion mass spectrum (figure S2) shows the loss of one, two, three and four molecules of CO at  $m/z = 975, 947, 919$  and  $891$  Da respectively.

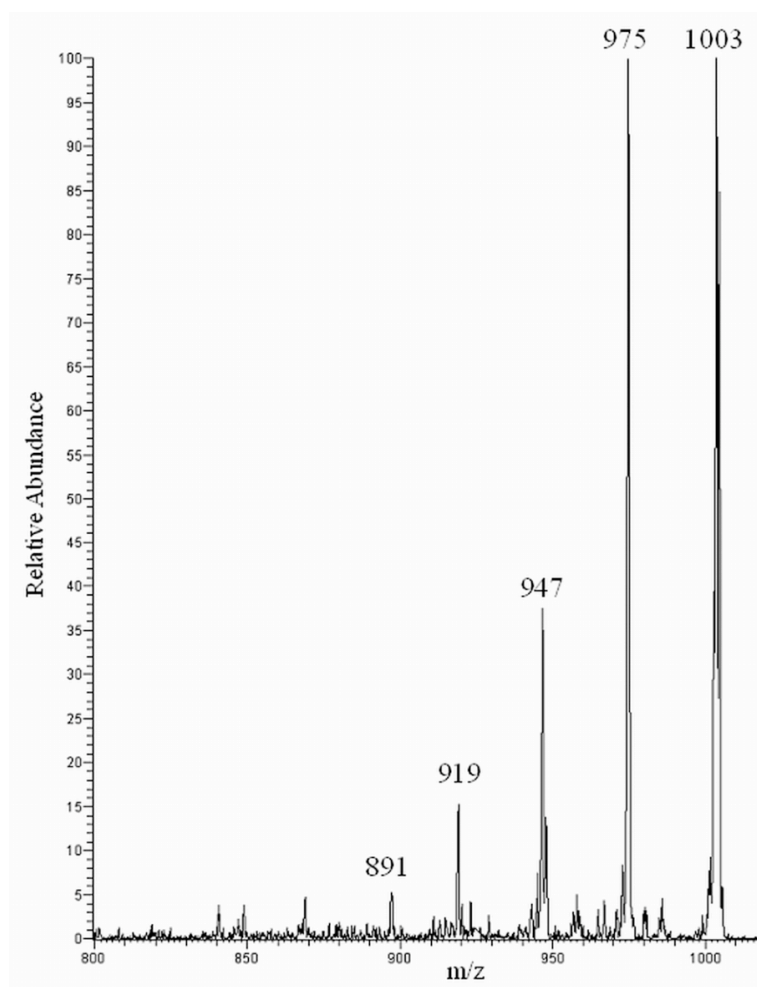

**Figure S2** Positive ion ESI-MS-MS spectrum of  $m/z = 1003$   $[M+H]^+$  of cluster **6** in  $CH_3OH$ .
